# Supplementary material
Source: publisher figshare collection journal article supplement (https://acs.figshare.com/ndownloader/files/3940732)
Supplement: Supplementary file 1 [file 3940732]

# Supporting information: Chemically Selective Imaging of C-H Stretching Vibrations With Time-Resolved Coherent Anti-Stokes Raman Scattering (CARS) Microscopy

Anne Kotiaho, Pasi Myllyperkiö, Mika Pettersson\*

Department of Chemistry, Nanoscience Center, University of Jyväskylä, P.O. Box 35, FI-40014 University of Jyväskylä, Finland

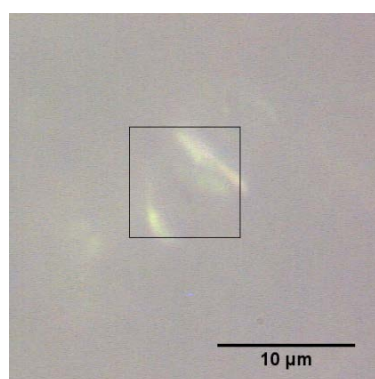

**Figure S1.** Optical microscope image of om-POSS particle embedded in PP, corresponding to CARS images shown in Figure 3 of the manuscript. The CARS imaged area is shown by the black square.

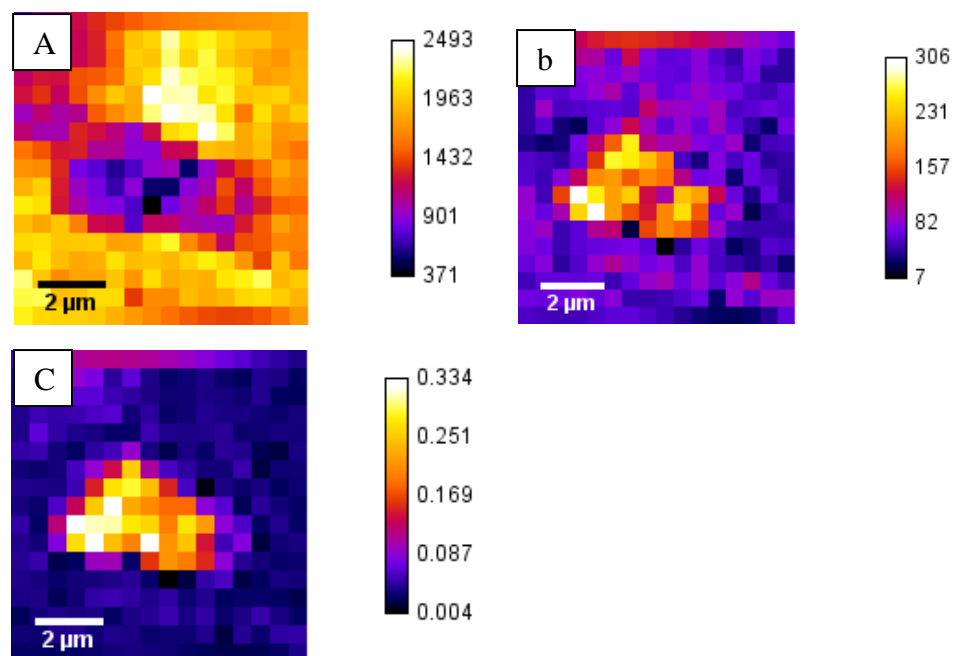

**Figure S2.** Raw data CARS images of Figure 3 of the main article. Images of om-POSS particle embedded in PP taken at probe delays of (A) 0.080 ps, (B) 0.48 ps and (C) ratio of CARS signals  $S(0.48 \text{ ps})/S(0.080 \text{ ps})$ .

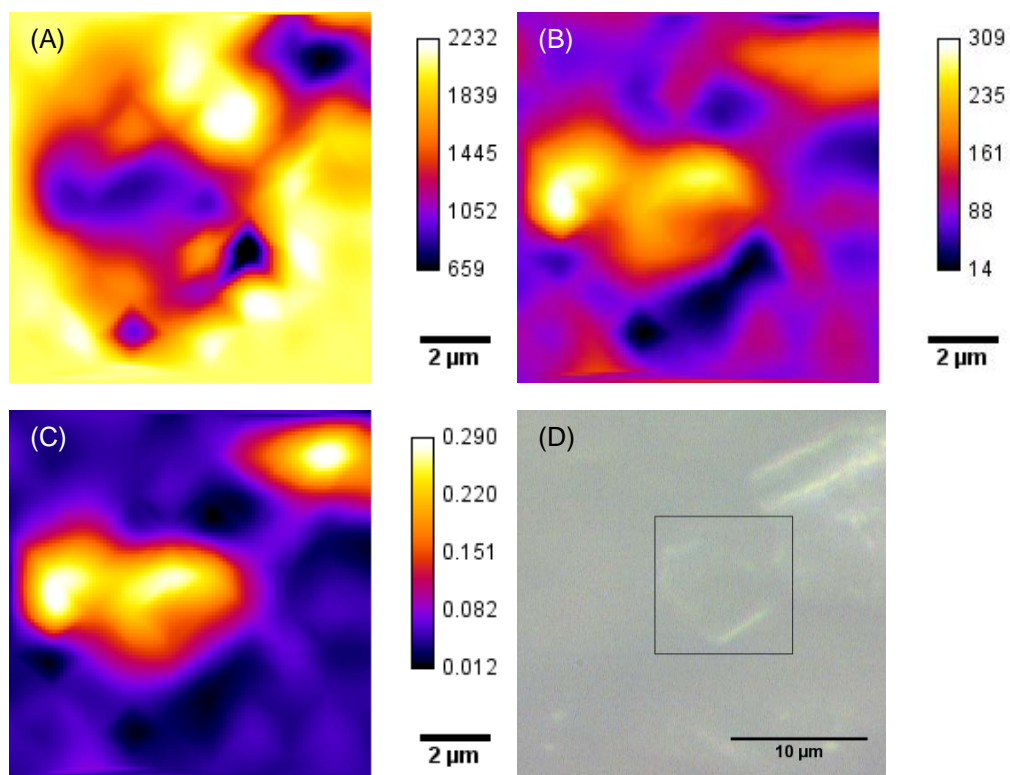

**Figure S2.** CARS images of an om-POSS particle embedded in PP taken at probe delays of (A) 0.080 ps, (B) 0.48 ps and (C) ratio of CARS signals  $S(0.48 \text{ ps})/S(0.080 \text{ ps})$ . Step was 1  $\mu\text{m}$  and the data was interpolated for easier visualization (to 0.1  $\mu\text{m}$  step). (D) Optical microscope image, where the CARS imaged area is shown by the black square.
